# Supplementary material for: Seasonal and Morphology Effects on Bioactive Compounds, Antioxidant Capacity, and Sugars Profile of Black Carrot (Daucus carota ssp. sativus var. atrorubens Alef.)
Source: MDPI journal article supplement (doi:10.3390/foods13101575), 2024-05-18
Supplement: s1 [file s1]

**Table S1.** The monthly values of the main meteorological factors of the experimental period (2016 to 2017 and 2017 to 2018).

| Month     | Temperature (°C) |               | Atmospheric Humidity (%) |               | Rainfall (mm) |             |
|-----------|------------------|---------------|--------------------------|---------------|---------------|-------------|
|           | 2016 - 2017      | 2017 - 2018   | 2016 - 2017              | 2017 - 2018   | 2016 - 2017   | 2017 - 2018 |
|           | Min-Max          | Min-Max       | Min-Max                  | Min-Max       | Accumulated   |             |
| August    | 18.93 - 32.62    | 18.34 - 33.89 | 26.62 - 65.97            | 23.64 - 71.98 | 0.40          | 40.20       |
| September | 14.28 - 30.50    | 13.99 - 29.45 | 24.84 - 71.33            | 25.42 - 80.05 | 5.20          | 0.00        |
| October   | 12.02 - 24.99    | 13.10 - 26.49 | 37.38 - 84.88            | 35.00 - 82.14 | 25.40         | 48.00       |
| November  | 5.26 - 16.86     | 5.02 - 19.70  | 47.86 - 96.09            | 39.23 - 92.89 | 125.20        | 78.00       |
| December  | 4.75 - 15.35     | 2.31 - 14.05  | 53.11 - 96.80            | 51.65 - 98.38 | 78.20         | 38.40       |
| January   | 0.06 - 13.74     | 1.94 - 13.75  | 44.70 - 97.09            | 57.01 - 99.82 | 18.00         | 42.00       |
| February  | 5.39 - 15.68     | 0.24 - 13.75  | 51.38 - 96.99            | 45.48 - 97.69 | 75.80         | 24.80       |
| March     | 5.36 - 18.41     | 5.30 - 14.75  | 42.21 - 94.85            | 53.87 - 98.66 | 33.40         | 202.80      |
| April     | 8.91 - 22.37     | 7.76 - 19.00  | 33.28 - 85.53            | 42.34 - 96.73 | 8.80          | 75.00       |

*Min: minimum; Max: maximum*

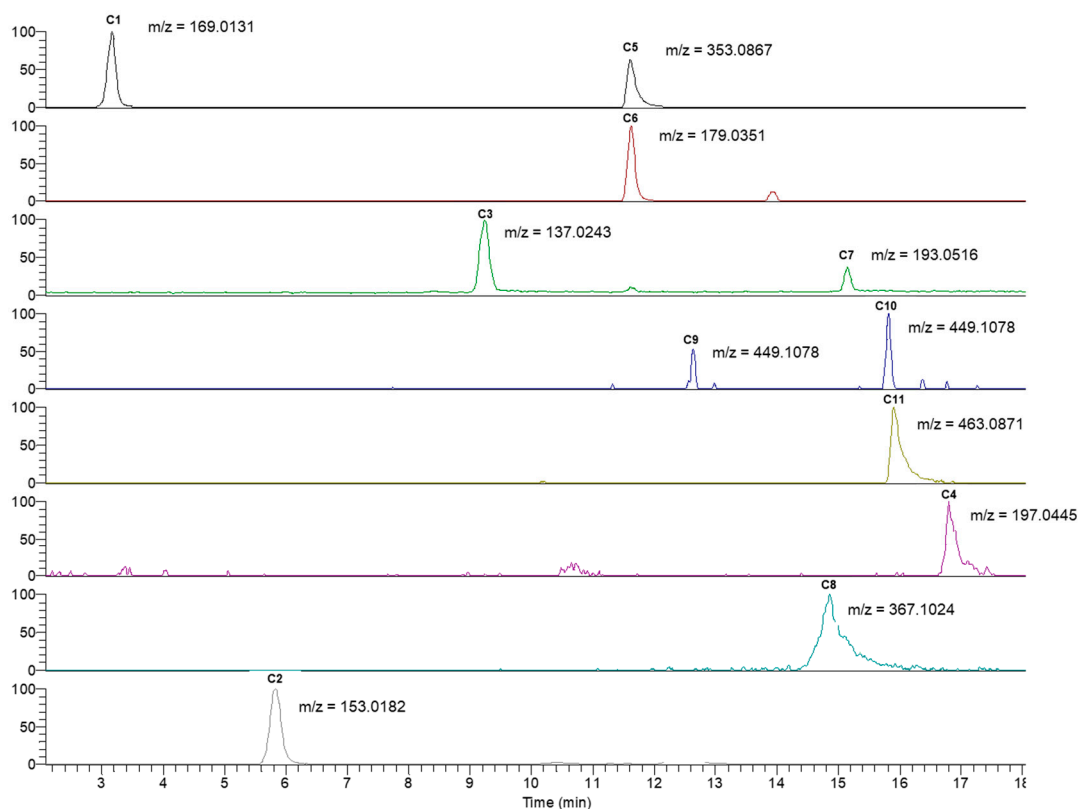

**Figure S1.** Representative UHPLC-HRMS profile of phenolic acids in black carrot. For peak identification see Table 1.

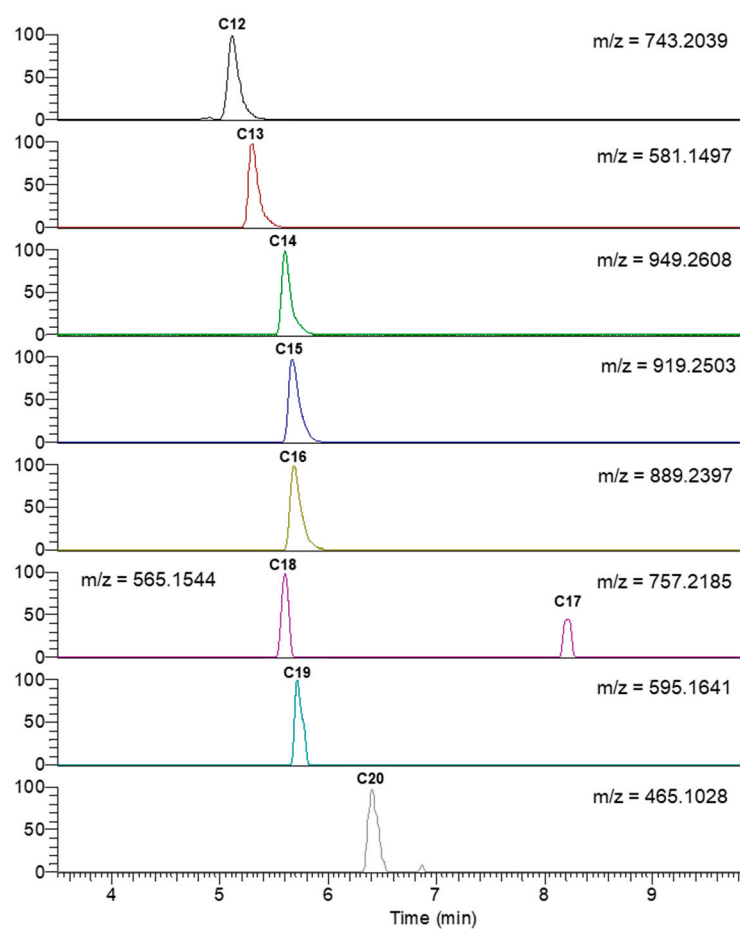

**Figure S2.** Representative UHPLC-HRMS profile of anthocyanins in black carrot. For peak identification see Table 1.

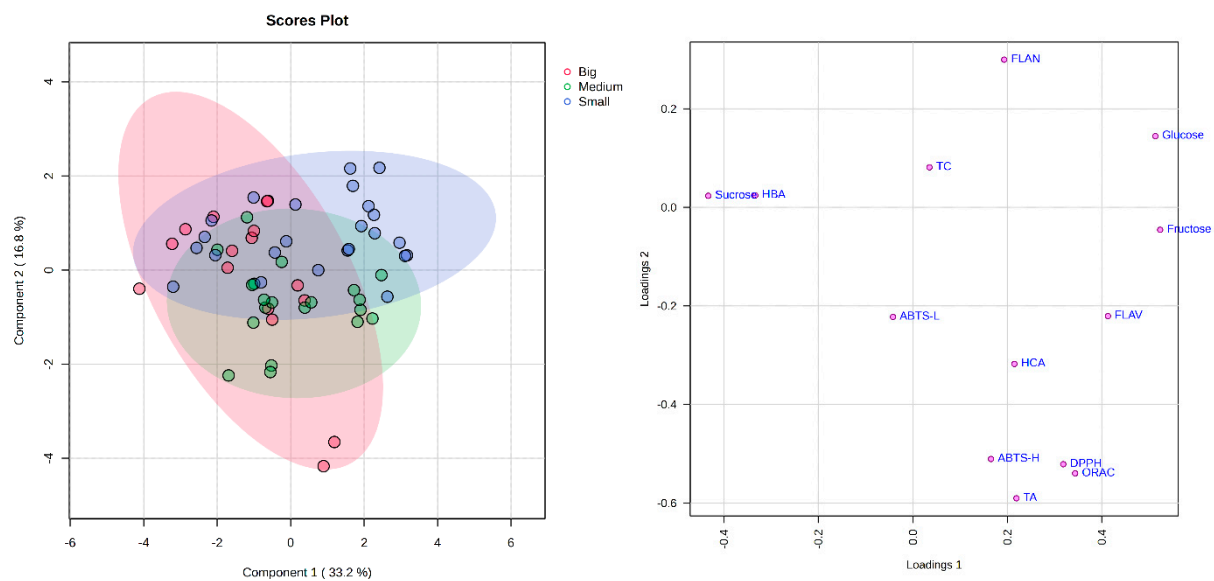

**Figure S3.** Scores plot (A) and loading plot (B) of the PLS-DA by the root size in black carrot. TA: total anthocyanins; HBA: total hydroxybenzoic acids; ABTS lip: ABTS of the lipophilic fraction; TC: total carotenoids; FLAV: flavonols; FLAN; flavanones; HCA: hydroxycinnamic acids.
